# Supplementary material
Source: publisher site journal article supplement (https://www.degruyterbrill.com/publication/isbn/9783486592870/downloadAsset/9783486592870_Inhaltsverzeichnis.pdf)
Supplement: Supplementary file 1 [file 9783486592870_Inhaltsverzeichnis.pdf]

# Inhaltsverzeichnis

|            |                                                                              |            |
|------------|------------------------------------------------------------------------------|------------|
| <b>I</b>   | <b>Grundlagen</b>                                                            | <b>1</b>   |
| 1          | Die Aufgaben der Prozessorganisation .....                                   | 1          |
| 1.1        | Einführung .....                                                             | 1          |
| 1.2        | Ein Beispiel: Prozess ‚Angebot bearbeiten‘ bei einem Gerätehersteller.....   | 6          |
| 1.3        | Zum Verhältnis von Prozess- und Aufbauorganisation .....                     | 10         |
| 1.4        | Prozessorganisation als Teil der Unternehmensführung .....                   | 21         |
| 2          | Merkmale betrieblicher Prozesse .....                                        | 23         |
| 2.1        | Folge der betrieblichen Prozesse .....                                       | 24         |
| 2.2        | Kunde-Lieferant-Beziehungen innerhalb der Prozessfolge .....                 | 24         |
| 2.3        | Input-Output-Relation eines betrieblichen Prozesses .....                    | 26         |
| 2.4        | Prozessschritte innerhalb eines Prozesses .....                              | 28         |
| 2.5        | Steuerung der Prozessschritte durch Informationen.....                       | 28         |
| 2.6        | Exkurs: IT-Unterstützung betrieblicher Prozesse.....                         | 31         |
| 3          | Darstellungsmittel für Prozesse.....                                         | 34         |
| 3.1        | Prozesslandkarten .....                                                      | 34         |
| 3.2        | Flussdiagramme.....                                                          | 44         |
| 4          | Die Praxis der Prozessorganisation .....                                     | 58         |
| 4.1        | Prozesse standardisieren.....                                                | 58         |
| 4.2        | Prozesse überwachen.....                                                     | 72         |
| 4.3        | Prozesse messen .....                                                        | 77         |
| 4.4        | Prozesse verbessern und erneuern .....                                       | 83         |
| <b>II</b>  | <b>Übersicht der in diesem Buch dargestellten Prozesse</b>                   | <b>91</b>  |
| 5          | Entwicklung einer Systematik für die Teile III bis IX .....                  | 91         |
| <b>III</b> | <b>Prozesse zur Festlegung der angebotenen Produkte und Dienstleistungen</b> | <b>97</b>  |
| 6          | Prozess ‚neue Produkte und Dienstleistungen planen‘ .....                    | 97         |
| <b>IV</b>  | <b>Kundenbezogene Prozesse I</b>                                             | <b>107</b> |
| 7          | Prozess ‚Kundenbestellung annehmen‘ .....                                    | 108        |
| 8          | Prozess ‚Angebot bearbeiten‘ .....                                           | 112        |

|             |                                                                         |            |
|-------------|-------------------------------------------------------------------------|------------|
| <b>V</b>    | <b>Prozesse zur Herstellung von Produkten</b>                           | <b>123</b> |
| 9           | Prozess ‚neues Produkt entwickeln‘ .....                                | 125        |
| 10          | Prozess ‚Fertigung vorbereiten‘ .....                                   | 132        |
| 11          | Prozess ‚Fertigung planen und steuern‘ .....                            | 136        |
| 12          | Prozess ‚Produkte liefern‘ .....                                        | 143        |
| <b>VI</b>   | <b>Prozesse zur Erbringung von Dienstleistungen</b>                     | <b>149</b> |
| 13          | Prozess ‚neue Dienstleistung konzipieren‘ .....                         | 152        |
| 14          | Prozess ‚Dienstleistung durchführen‘ .....                              | 164        |
| <b>VII</b>  | <b>Prozesse zur Durchführung von Projekten</b>                          | <b>175</b> |
| 15          | Prozess ‚Projekt planen und überwachen‘ .....                           | 175        |
| <b>VIII</b> | <b>LIEFERANTENBEZOGENE PROZESSE</b>                                     | <b>185</b> |
| 16          | Prozess ‚Lieferant auf Basis eines Angebots beauftragen‘ .....          | 186        |
| 17          | Prozess ‚beim Lieferanten bestellen‘ .....                              | 190        |
| 18          | Prozess ‚Wareneingangsprüfung durchführen‘ .....                        | 194        |
| 19          | Ausgelagerte Prozesse (Outsourcing) .....                               | 196        |
| <b>IX</b>   | <b>Kundenbezogene Prozesse II</b>                                       | <b>201</b> |
| 20          | Prozess ‚Kundenbeschwerde bearbeiten‘ .....                             | 201        |
| <b>X</b>    | <b>Vertiefung zur Darstellung betrieblicher Prozesse</b>                | <b>207</b> |
| 21          | Ereignisgesteuerte Prozessketten (EPK) .....                            | 207        |
| 21.1        | Elemente von Ereignisgesteuerten Prozessketten (EPK) .....              | 208        |
| 21.2        | Elemente von erweiterten Ereignisgesteuerten Prozessketten (eEPK) ..... | 215        |
| 21.3        | Verknüpfung von Ereignissen und Funktionen .....                        | 219        |
| 21.4        | Vor- und Nachteile von EPK gegenüber Flussdiagrammen .....              | 226        |
| <b>XI</b>   | <b>Ausblick</b>                                                         | <b>231</b> |
| <b>XII</b>  | <b>Lösungen zu den Kontrollfragen</b>                                   | <b>233</b> |
| <b>XIII</b> | <b>Literaturverzeichnis</b>                                             | <b>255</b> |
| <b>XIV</b>  | <b>Stichwortverzeichnis</b>                                             | <b>263</b> |
